# Supplementary material for: Designing and Synthesis of New Isatin Derivatives as Potential CDK2 Inhibitors
Source: MDPI journal article supplement (doi:10.3390/ijms23148046), 2022-07-21
Supplement: s1 [file s1]

## Designing and synthesis of new isatin derivatives as potential CDK2 inhibitors

Przemysław Czeleń <sup>1\*</sup>, Agnieszka Skotnicka <sup>2</sup> and Beata Szefer <sup>1</sup>

<sup>1</sup>Department of Physical Chemistry, Faculty of Pharmacy, Collegium Medicum, Nicolaus Copernicus University, Kurpińskiego 5, 85-096 Bydgoszcz, Poland

<sup>2</sup>Faculty of Chemical Technology and Engineering, Bydgoszcz University of Science and Technology, Seminaryjna 3, 85-326 Bydgoszcz, Poland

### Supplementary materials:

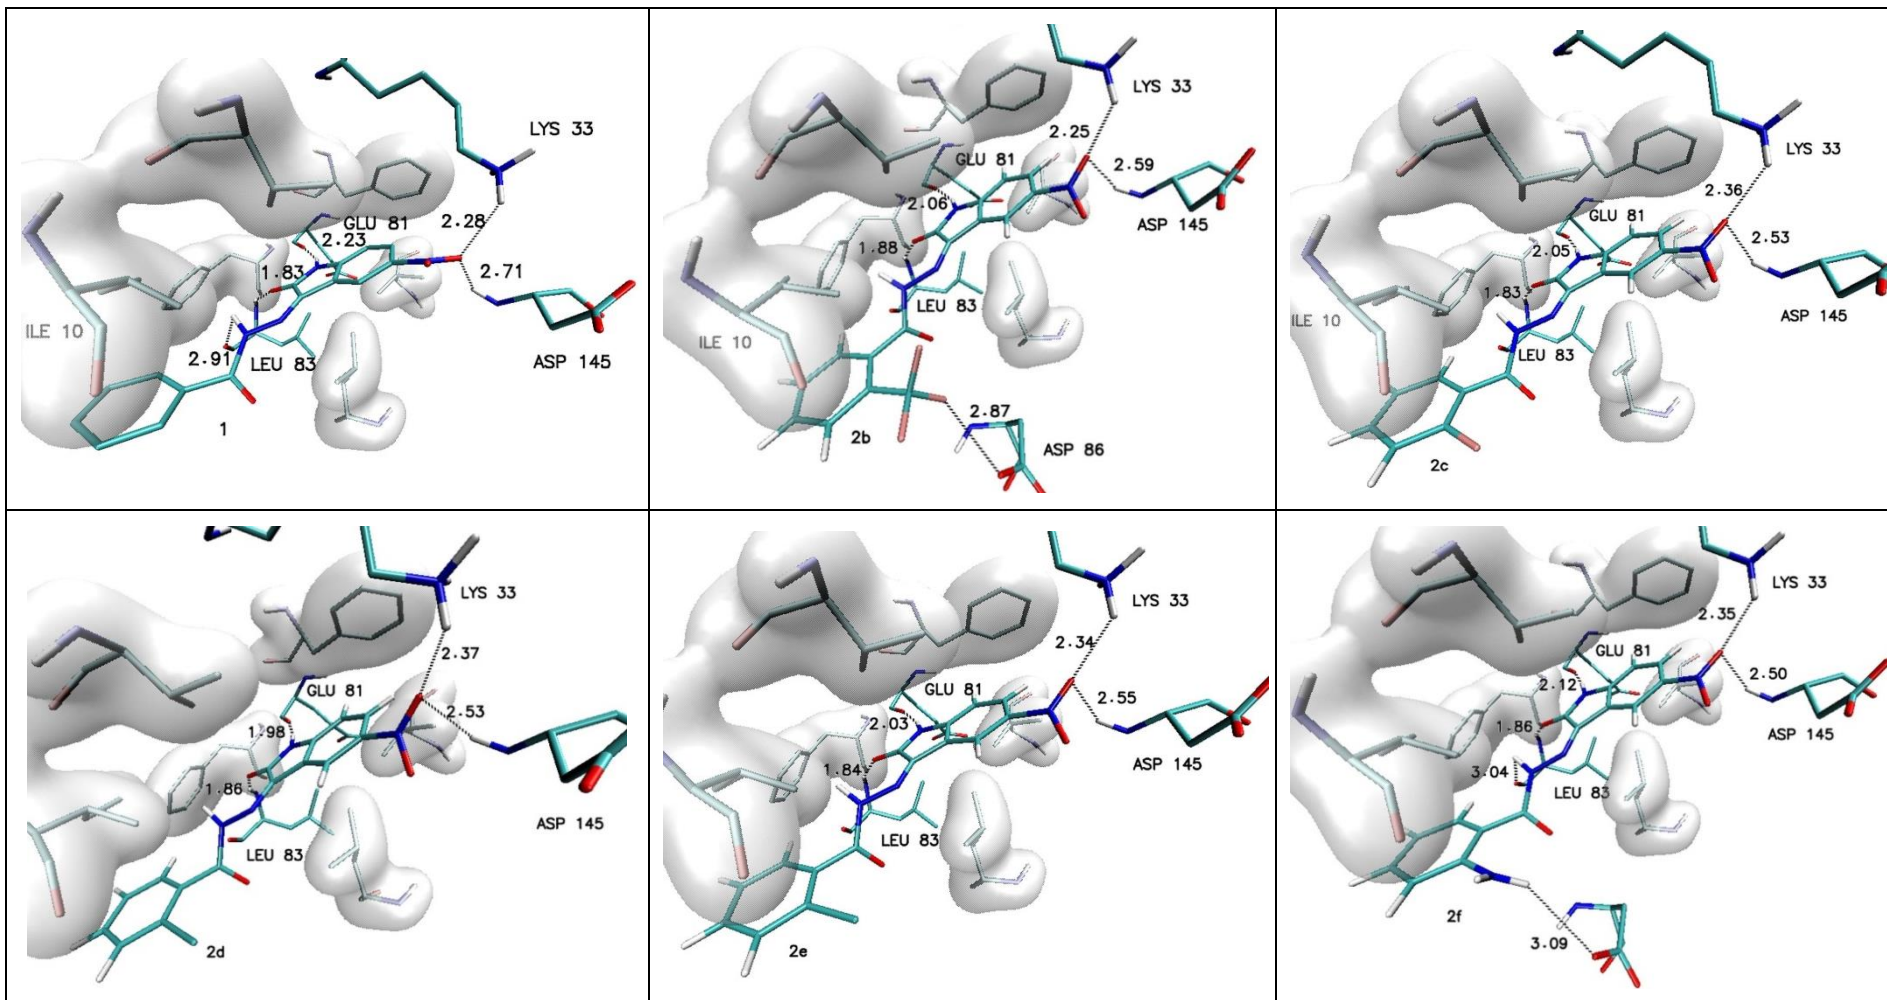

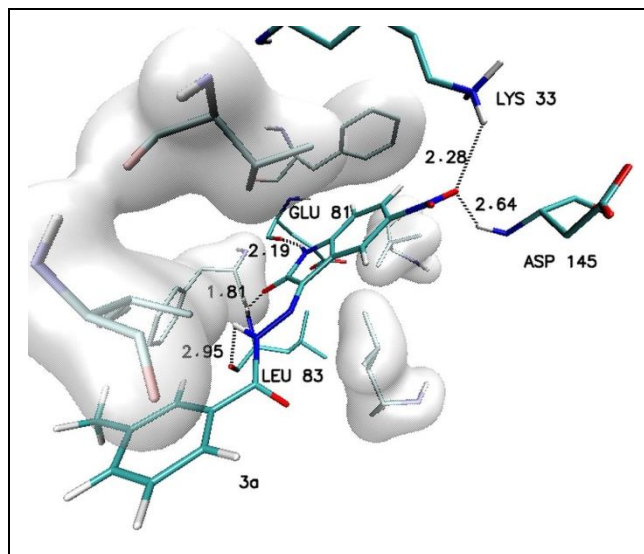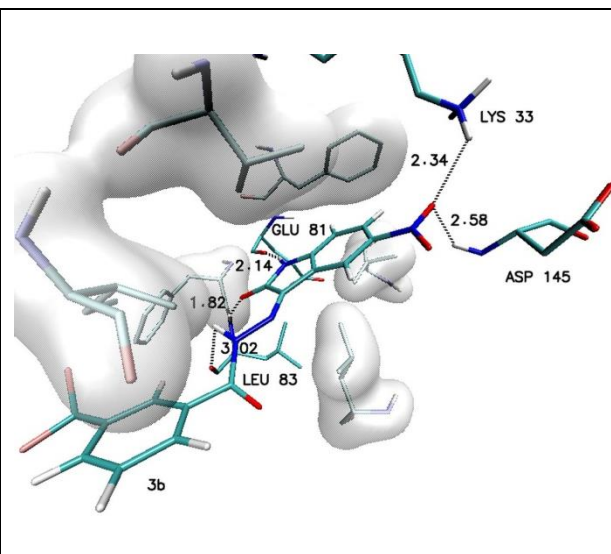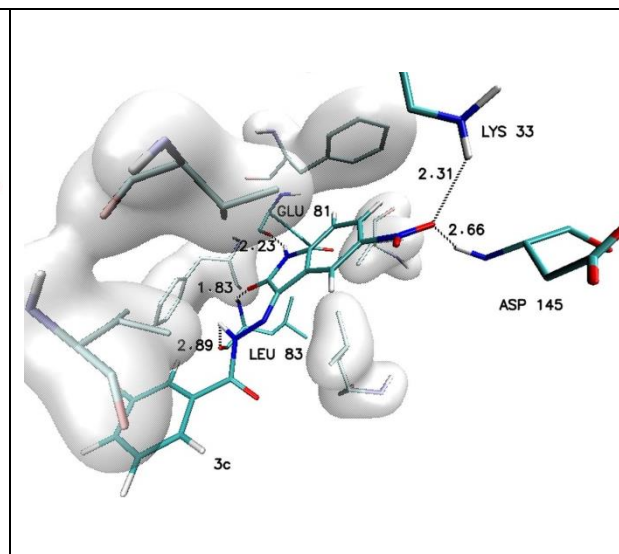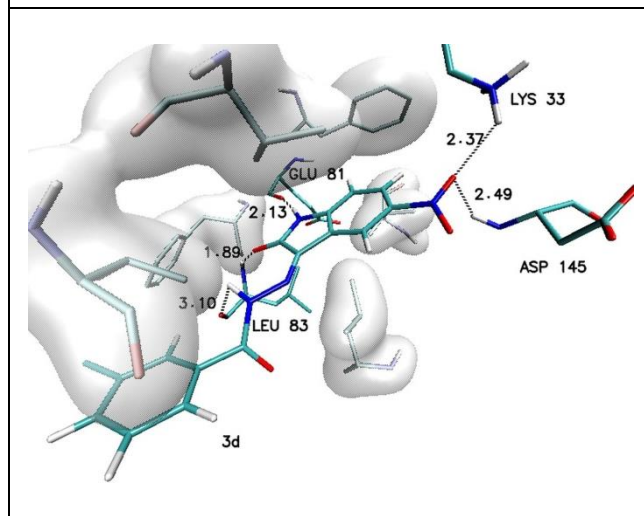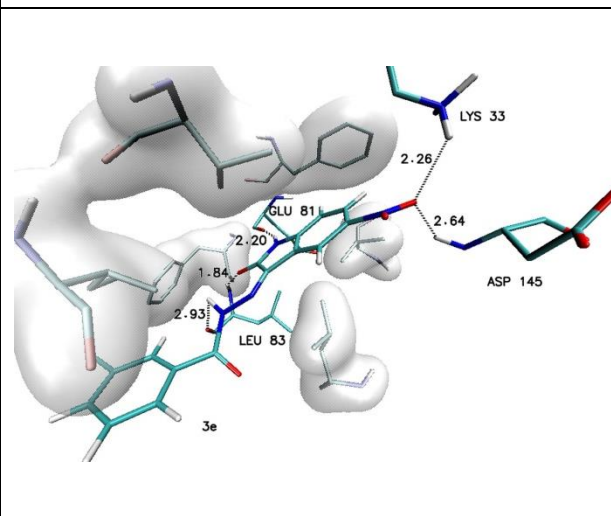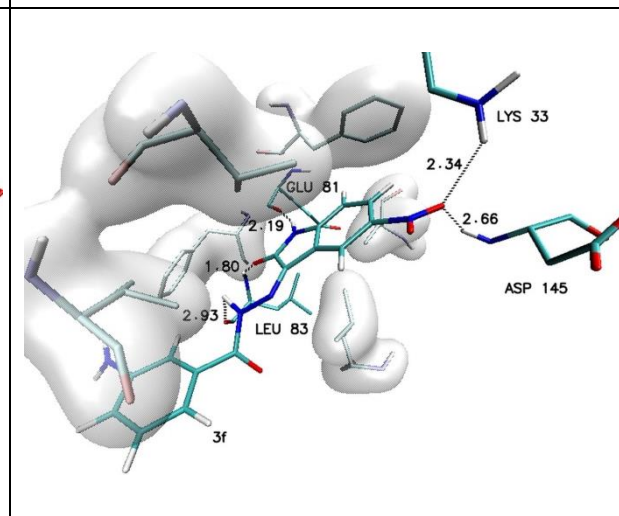

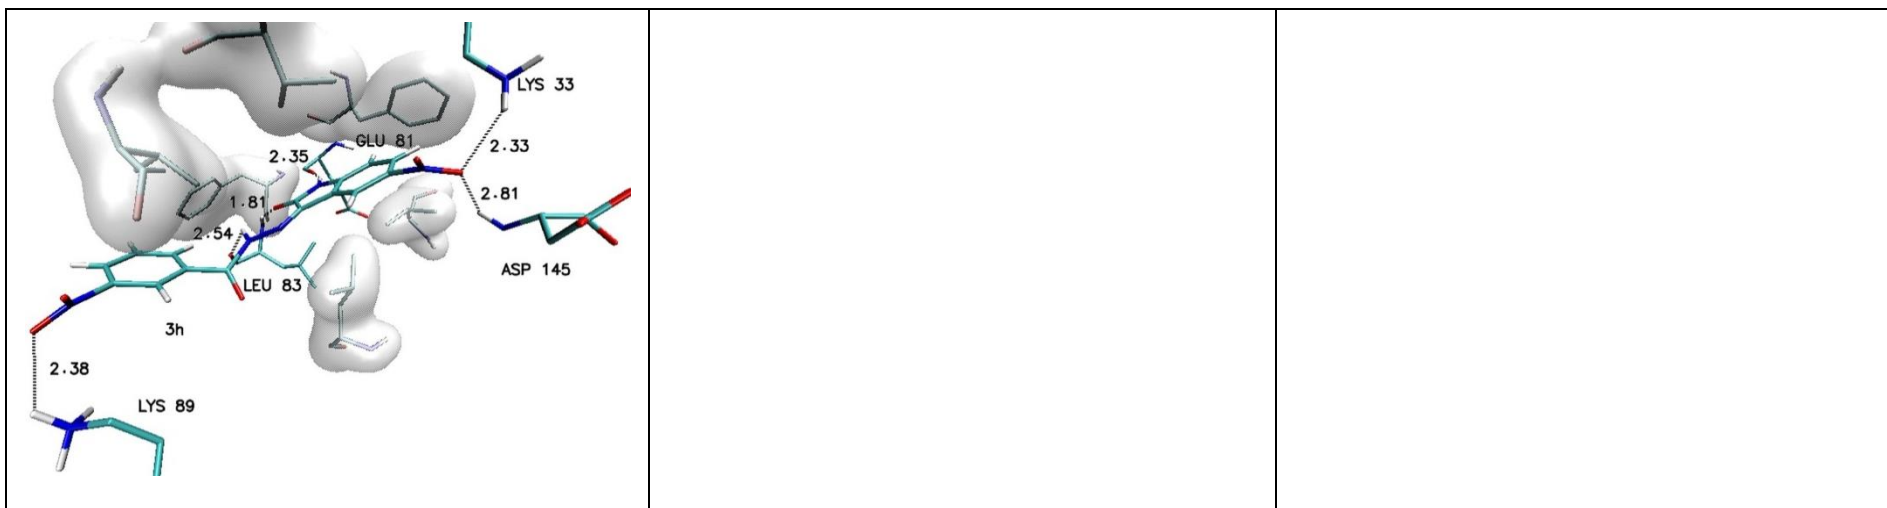

Figure S1. The graphic representation of interactions involved in stabilization of CDK2 complex with 5-nitroisatin-based benzoylhydrazines analyzed during molecular dynamics simulations.

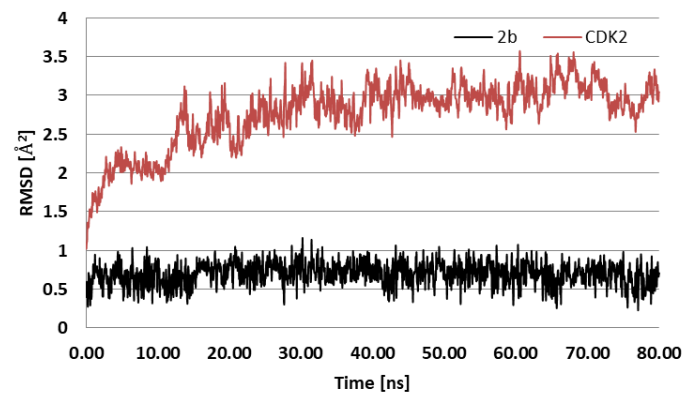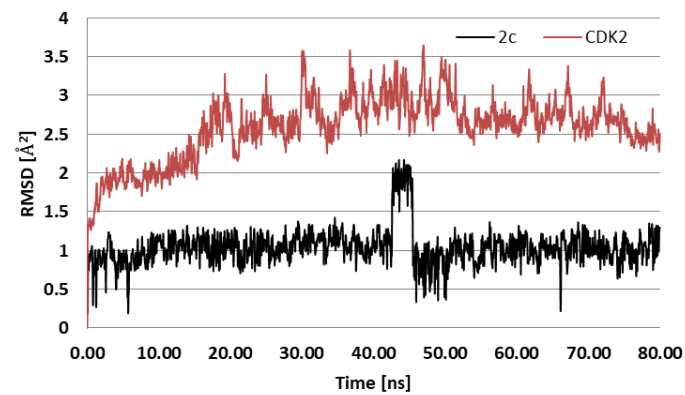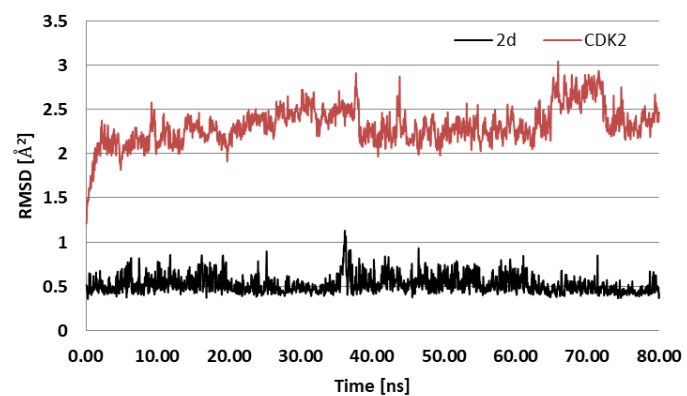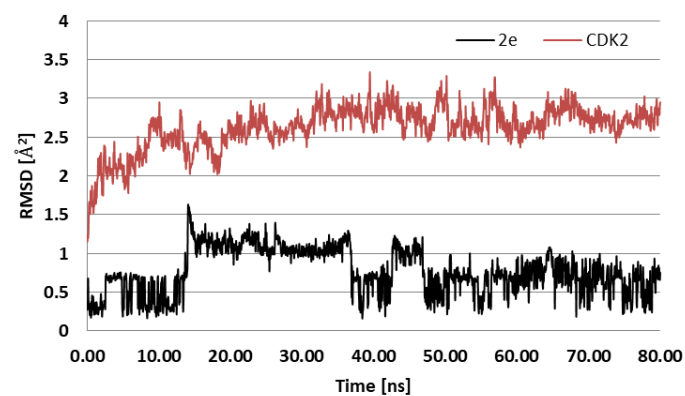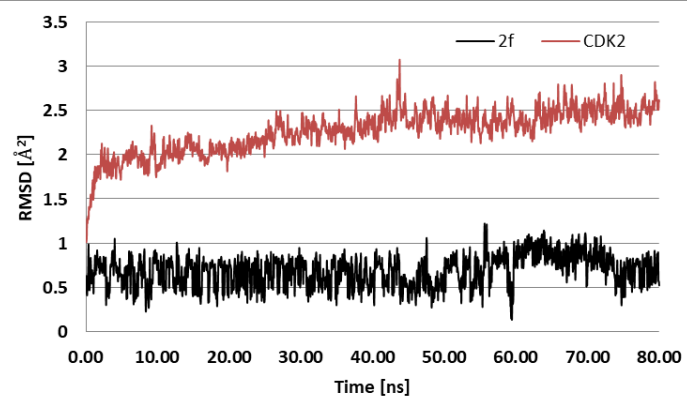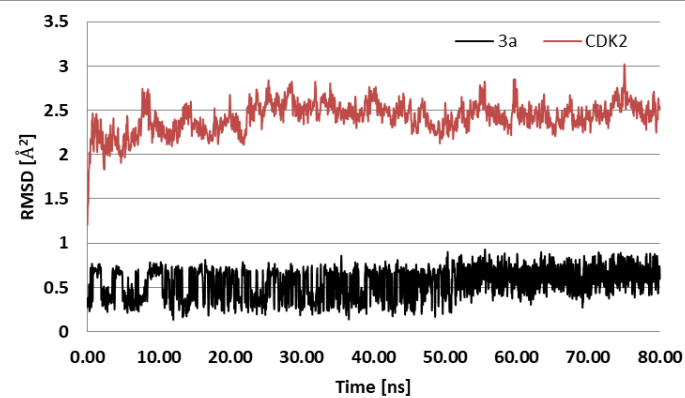

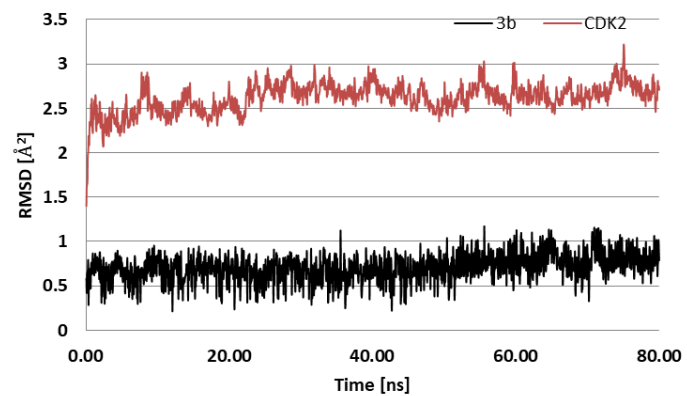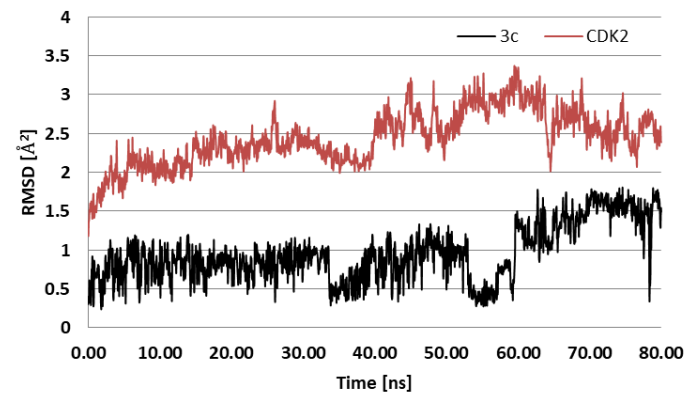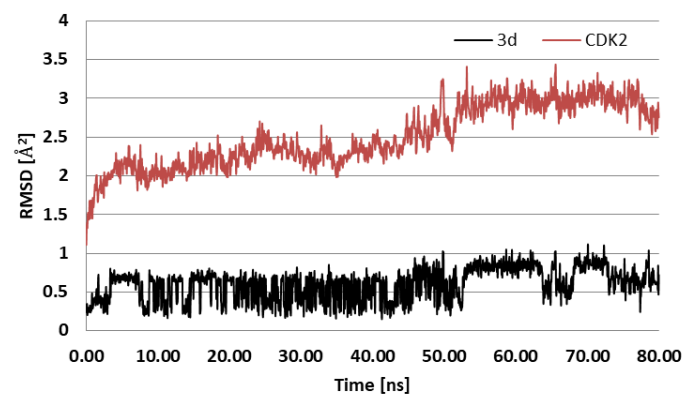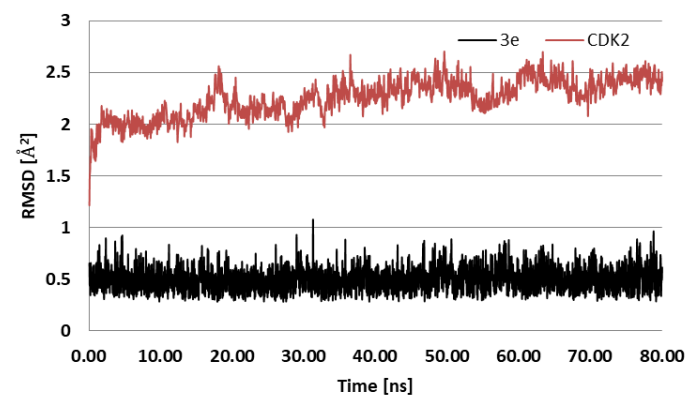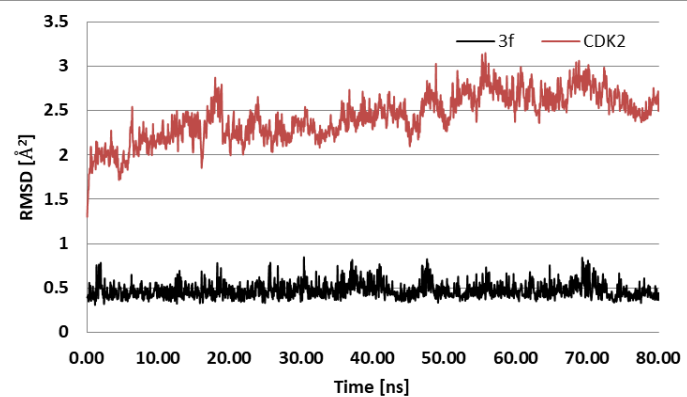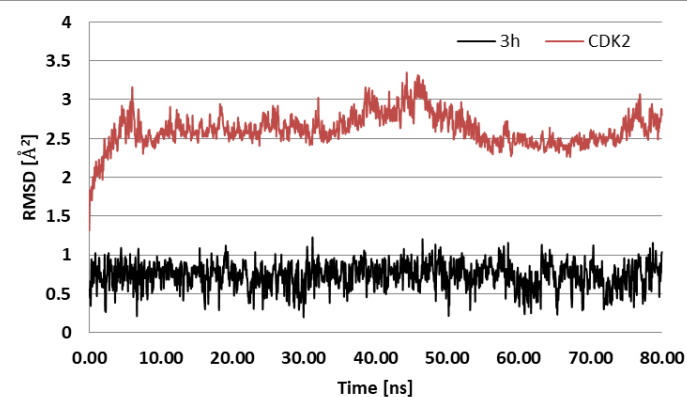

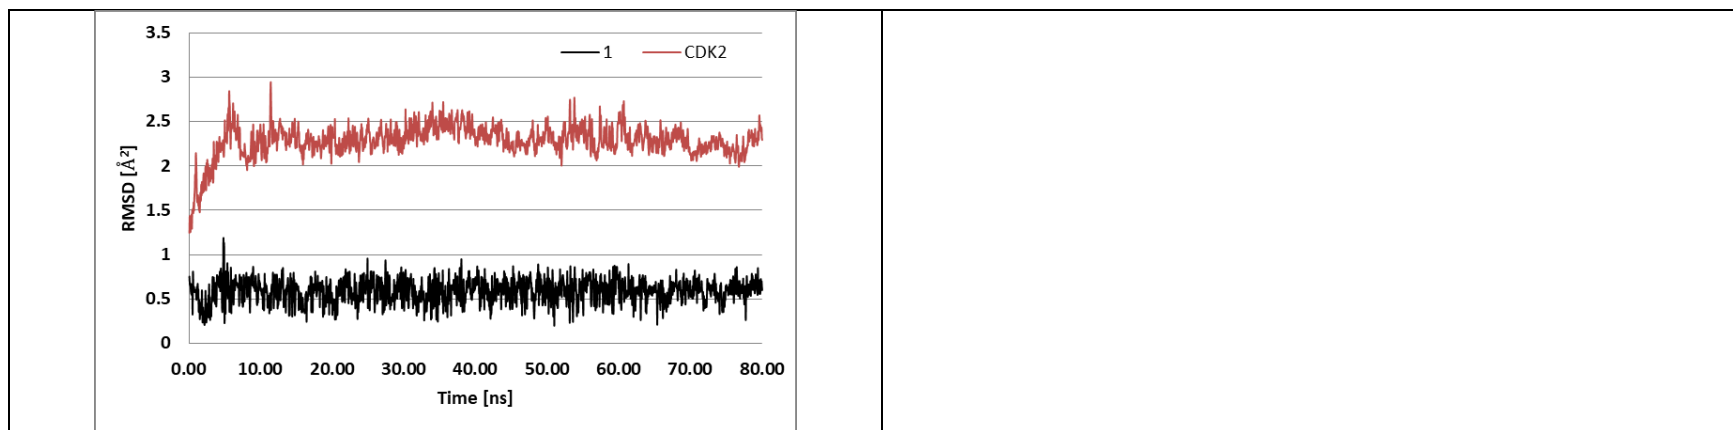

Figure S2. Distributions of RMSD values. Black distributions refer to ligand molecules while brown distributions refer to CDK-2 protein.



Table S1. The cumulative analysis of the length of the interactions identified in CDK2 complexes with 5-nitroisatin-based benzoylhydrazines. The distances presented in the table represent middle values of intervals with a width of 0.2 Å.

| INTERACTIONS                | Population % |     |      |      |      |      |      |      |      |
|-----------------------------|--------------|-----|------|------|------|------|------|------|------|
|                             | Σ            | 1.6 | 1.8  | 2    | 2.2  | 2.4  | 2.6  | 2.8  | 3    |
| 1                           |              |     |      |      |      |      |      |      |      |
| Ligand (H1) ... (O) GLU 81  | 100.0        | 2.6 | 54.6 | 37.1 | 5.3  | 0.5  | 0.0  | 0.0  | 0.0  |
| Ligand (O1) ... (HN) LEU 83 | 100.0        | 0.6 | 28.2 | 46.4 | 19.2 | 4.6  | 0.9  | 0.1  | 0.0  |
| Ligand (O) ... (H) LYS 33   | 82.8         | 0.1 | 0.1  | 0.1  | 0.1  | 0.1  | 0.1  | 0.1  | 0.1  |
| Ligand (O) ... (H) ASP 145  | 58.8         | 0.0 | 0.6  | 2.9  | 6.6  | 9.1  | 11.9 | 14.3 | 13.5 |
| Ligand (H5) ... (O) LEU 83  | 19.62        | 0.0 | 0.1  | 0.9  | 0.6  | 0.9  | 2.5  | 3.7  | 10.9 |
| 2b                          |              |     |      |      |      |      |      |      |      |
| Ligand (H1) ... (O) GLU 81  | 100.0        | 4.1 | 49.5 | 37.1 | 7.8  | 1.3  | 0.2  | 0.0  | 0.0  |
| Ligand (O2) ... (HN) LEU 83 | 99.9         | 0.6 | 22.6 | 40.9 | 21.9 | 9.3  | 3.4  | 1.2  | 0.1  |
| Ligand (O) ... (H) LYS 33   | 91.5         | 0.0 | 5.1  | 13.4 | 18.1 | 17.6 | 16.4 | 11.4 | 9.5  |
| Ligand (H5) ... (O) LEU 83  | 85.5         | 0.8 | 16.7 | 29.3 | 12.9 | 5.2  | 4.1  | 6.0  | 10.4 |
| Ligand (F) ... (O) ILE 10   | 64.2         | 0.0 | 0.0  | 0.0  | 0.0  | 0.0  | 2.8  | 20.0 | 41.3 |
| Ligand (O) ... (H) ASP 145  | 91.0         | 0.1 | 3.0  | 16.8 | 21.2 | 15.9 | 14.6 | 10.5 | 8.9  |
| 2c                          |              |     |      |      |      |      |      |      |      |
| Ligand (H1) ... (O) GLU 81  | 100.0        | 2.4 | 39.2 | 40.6 | 16.8 | 0.9  | 0.1  | 0.0  | 0.0  |
| Ligand (O1) ... (HN) LEU 83 | 99.9         | 0.5 | 13.3 | 39.6 | 28.7 | 11.9 | 4.3  | 1.6  | 0.2  |
| Ligand (O) ... (H) LYS 33   | 61.4         | 0.1 | 4.1  | 11.1 | 12.3 | 10.6 | 9.6  | 7.9  | 5.8  |
| Ligand (O) ... (H) ASP 145  | 36.8         | 0.0 | 0.4  | 4.0  | 5.6  | 8.8  | 4.7  | 7.0  | 6.3  |
| Ligand (F) ... (O) ILE 10   | 28.4         | 0.0 | 0.0  | 0.0  | 0.0  | 0.0  | 0.7  | 8.8  | 19.0 |
| 2d                          |              |     |      |      |      |      |      |      |      |
| Ligand (H1) ... (O) GLU 81  | 100.0        | 2.1 | 49.1 | 40.2 | 7.4  | 1.1  | 0.1  | 0.0  | 0.0  |
| Ligand (O1) ... (HN) LEU 83 | 100.0        | 0.2 | 25.1 | 46.3 | 20.1 | 6.8  | 1.6  | 0.1  | 0.0  |
| Ligand (O) ... (H) LYS 33   | 81.2         | 0.2 | 8.6  | 17.4 | 19.7 | 15.2 | 8.5  | 6.9  | 4.7  |
| Ligand (O) ... (H) ASP 145  | 33.3         | 0.0 | 0.0  | 0.6  | 1.8  | 3.1  | 7.0  | 9.1  | 11.6 |
| 2e                          |              |     |      |      |      |      |      |      |      |

|                                               |       |     |      |      |      |      |      |      |      |
|-----------------------------------------------|-------|-----|------|------|------|------|------|------|------|
| Ligand ( <b>H1</b> ) ... ( <b>O</b> ) GLU 81  | 100.0 | 2.3 | 52.2 | 39.5 | 5.8  | 0.3  | 0.1  | 0.0  |      |
| Ligand ( <b>O1</b> ) ... ( <b>HN</b> ) LEU 83 | 100.0 | 0.2 | 22.1 | 48.1 | 22.7 | 5.4  | 1.1  | 0.4  | 0.1  |
| Ligand ( <b>O</b> ) ... ( <b>H</b> ) LYS 33   | 51.1  | 0.1 | 3.9  | 8.7  | 9.5  | 8.6  | 7.7  | 6.8  | 5.9  |
| Ligand ( <b>O</b> ) ... ( <b>H</b> ) ASP 145  | 54.3  | 0.0 | 0.1  | 2.9  | 6.3  | 7.7  | 10.4 | 12.6 | 14.2 |
| 2f                                            |       |     |      |      |      |      |      |      |      |
| Ligand ( <b>H1</b> ) ... ( <b>O</b> ) GLU 81  | 100.0 | 2.1 | 48.4 | 41.6 | 6.8  | 0.8  | 0.1  | 0.1  | 0.0  |
| Ligand ( <b>O1</b> ) ... ( <b>HN</b> ) LEU 83 | 100.0 | 0.6 | 23.0 | 48.1 | 21.3 | 5.5  | 1.3  | 0.3  | 0.0  |
| Ligand ( <b>O</b> ) ... ( <b>H</b> ) LYS 33   | 83.6  | 0.1 | 9.7  | 15.8 | 18.3 | 14.3 | 11.3 | 8.1  | 6.1  |
| Ligand ( <b>O</b> ) ... ( <b>H</b> ) ASP 145  | 65.6  | 0.0 | 2.4  | 7.9  | 10.8 | 15.8 | 12.4 | 8.4  | 8.1  |
| 3a                                            |       |     |      |      |      |      |      |      |      |
| Ligand ( <b>H1</b> ) ... ( <b>O</b> ) GLU 81  | 100.0 | 2.3 | 44.2 | 45.9 | 7.1  | 0.4  | 0.1  | 0.0  | 0.0  |
| Ligand ( <b>O1</b> ) ... ( <b>HN</b> ) LEU 83 | 100.0 | 0.1 | 20.1 | 44.4 | 26.2 | 5.6  | 3.3  | 0.3  | 0.1  |
| Ligand ( <b>O</b> ) ... ( <b>H</b> ) LYS 33   | 57.3  | 0.1 | 2.4  | 7.2  | 9.3  | 9.3  | 10.0 | 10.8 | 8.3  |
| Ligand ( <b>O</b> ) ... ( <b>H</b> ) ASP 145  | 55.3  | 0.0 | 0.3  | 3.4  | 7.2  | 9.9  | 12.9 | 9.9  | 11.5 |
| Ligand ( <b>H5</b> ) ... ( <b>O</b> ) LEU 83  | 11.4  | 0.0 | 0.0  | 0.1  | 0.4  | 0.6  | 0.8  | 2.6  | 7.0  |
| 3b                                            |       |     |      |      |      |      |      |      |      |
| Ligand ( <b>H1</b> ) ... ( <b>O</b> ) GLU 81  | 100.0 | 3.3 | 54.2 | 35.9 | 6.1  | 0.4  | 0.1  | 0.0  | 0.0  |
| Ligand ( <b>O1</b> ) ... ( <b>HN</b> ) LEU 83 | 100.0 | 0.1 | 24.1 | 46.7 | 21.9 | 5.6  | 1.3  | 0.3  | 0.1  |
| Ligand ( <b>O</b> ) ... ( <b>H</b> ) LYS 33   | 79.3  | 0.1 | 5.4  | 12.2 | 16.3 | 14.3 | 12.0 | 10.8 | 8.3  |
| Ligand ( <b>O</b> ) ... ( <b>H</b> ) ASP 145  | 66.3  | 0.0 | 0.3  | 4.4  | 11.2 | 15.9 | 12.9 | 9.9  | 11.5 |
| Ligand ( <b>H5</b> ) ... ( <b>O</b> ) LEU 83  | 11.4  | 0.0 | 0.0  | 0.1  | 0.4  | 0.6  | 0.8  | 2.6  | 7.0  |
| 3c                                            |       |     |      |      |      |      |      |      |      |
| Ligand ( <b>H1</b> ) ... ( <b>O</b> ) GLU 81  | 100.0 | 1.9 | 37.1 | 40.9 | 18.7 | 1.2  | 0.2  | 0.0  | 0.0  |
| Ligand ( <b>O1</b> ) ... ( <b>HN</b> ) LEU 83 | 100.0 | 0.6 | 22.1 | 43.6 | 27.8 | 4.4  | 1.0  | 0.4  | 0.0  |
| Ligand ( <b>O</b> ) ... ( <b>H</b> ) LYS 33   | 44.2  | 0.0 | 1.8  | 5.8  | 6.9  | 7.4  | 7.9  | 7.1  | 7.4  |
| 3d                                            |       |     |      |      |      |      |      |      |      |
| Ligand ( <b>H1</b> ) ... ( <b>O</b> ) GLU 81  | 99.9  | 3.1 | 56.8 | 34.2 | 5.6  | 0.3  | 0.0  | 0.0  | 0.0  |
| Ligand ( <b>O1</b> ) ... ( <b>HN</b> ) LEU 83 | 99.9  | 0.4 | 23.2 | 45.1 | 23.1 | 6.3  | 1.4  | 0.4  | 0.0  |
| Ligand ( <b>O</b> ) ... ( <b>H</b> ) LYS 33   | 72.3  | 0.1 | 5.1  | 13.4 | 13.7 | 10.6 | 13.5 | 8.6  | 7.3  |
| Ligand ( <b>O</b> ) ... ( <b>H</b> ) ASP 145  | 46.2  | 0.0 | 0.7  | 3.2  | 5.9  | 7.7  | 8.4  | 9.1  | 11.3 |



| 3e                                            |       |     |      |      |      |      |      |      |      |
|-----------------------------------------------|-------|-----|------|------|------|------|------|------|------|
| Ligand ( <b>H1</b> ) ... ( <b>O</b> ) GLU 81  | 100.0 | 3.1 | 56.5 | 36.3 | 3.6  | 0.6  | 0.0  | 0.0  | 0.0  |
| Ligand ( <b>O1</b> ) ... ( <b>HN</b> ) LEU 83 | 100.0 | 0.4 | 26.7 | 48.1 | 19.4 | 4.8  | 0.5  | 0.0  | 0.0  |
| Ligand ( <b>O</b> ) ... ( <b>H</b> ) LYS 33   | 79.8  | 0.1 | 7.2  | 20.8 | 19.7 | 13.9 | 7.3  | 5.9  | 4.9  |
| Ligand ( <b>O</b> ) ... ( <b>H</b> ) ASP 145  | 86.8  | 0.0 | 1.4  | 11.3 | 19.2 | 20.8 | 16.6 | 9.9  | 7.6  |
| 3f                                            |       |     |      |      |      |      |      |      |      |
| Ligand ( <b>H3</b> ) ... ( <b>O</b> ) GLU 81  | 100.0 | 1.9 | 49.3 | 39.4 | 8.4  | 0.9  | 0.1  | 0.0  | 0.0  |
| Ligand ( <b>O2</b> ) ... ( <b>HN</b> ) LEU 83 | 100.0 | 0.1 | 12.1 | 39.1 | 31.1 | 14.4 | 2.6  | 0.8  | 0.0  |
| Ligand ( <b>O</b> ) ... ( <b>H</b> ) LYS 33   | 71.3  | 0.1 | 3.9  | 10.4 | 14.8 | 12.6 | 11.5 | 10.8 | 7.1  |
| Ligand ( <b>O</b> ) ... ( <b>H</b> ) ASP 145  | 55.5  | 0.0 | 0.8  | 4.9  | 7.9  | 9.1  | 8.6  | 11.8 | 12.5 |
| Ligand ( <b>H5</b> ) ... ( <b>O</b> ) LEU 83  | 98.9  | 0.3 | 18.3 | 33.4 | 25.9 | 12.2 | 5.5  | 2.3  | 1.1  |
| 3h                                            |       |     |      |      |      |      |      |      |      |
| Ligand ( <b>H1</b> ) ... ( <b>O</b> ) GLU 81  | 100.0 | 1.9 | 48.0 | 42.4 | 7.1  | 0.6  | 0.1  |      |      |
| Ligand ( <b>O1</b> ) ... ( <b>HN</b> ) LEU 83 | 100.0 | 0.5 | 22.3 | 47.9 | 21.8 | 5.8  | 1.6  | 0.1  | 0.1  |
| Ligand ( <b>O</b> ) ... ( <b>H</b> ) LYS 33   | 84.4  | 0.2 | 12.8 | 19.9 | 16.4 | 13.5 | 10.8 | 5.9  | 4.8  |
| Ligand ( <b>O</b> ) ... ( <b>H</b> ) ASP 145  | 67.6  | 0.0 | 2.6  | 4.4  | 8.2  | 10.6 | 11.1 | 14.6 | 16.2 |
| Ligand ( <b>H5</b> ) ... ( <b>O</b> ) LEU 83  | 15.4  | 0.0 | 0.1  | 0.8  | 0.8  | 0.9  | 2.0  | 3.6  | 7.3  |
